# Supplementary material for: Rational metabolic-flow switching for the production of exogenous secondary metabolites in bamboo suspension cells
Source: PubMed Central journal article supplement (PMC6123407; doi:10.1038/s41598-018-31566-4), 2018-09-04
Supplement: 41598_2018_31566_MOESM1_ESM.pdf [file 41598_2018_31566_MOESM1_ESM.pdf]

## **Supplementary Information**

for:

**Rational metabolic-flow switching for the production of exogenous secondary metabolites in bamboo suspension cells**

Taiji Nomura<sup>1,\*</sup>, Shinjiro Ogita<sup>2</sup>, Yasuo Kato<sup>1</sup>

*<sup>1</sup>Biotechnology Research Center and Department of Biotechnology, Toyama Prefectural University, 5180 Kurokawa, Imizu, Toyama 939-0398, Japan*

*<sup>2</sup>Faculty of Life and Environmental Sciences, Prefectural University of Hiroshima, 5562 Nanatsukacho, Shobara, Hiroshima 727-0023, Japan*

\*Corresponding author. e-mail: [tnomura@pu-toyama.ac.jp](mailto:tnomura@pu-toyama.ac.jp)

## Supplementary Methods

### *Genomic and RT-PCR analyses*

PCR analyses for verification of the presence and transcription of full-length *HvACT1* and *HPT* genes in the transformed Pn cells were performed using three sets of gene-specific primers:

for *HvACT1* (full-length coding sequence),

5'-ATGAAGATCACCGTGCACTC-3' (forward) and

5'-CTAGTCGAGGCTGTAGCAGCAG-3' (reverse);

for *HPT* (full-length coding sequence),

5'-ATGAAAAAGCCTGAACTCACC-3' (forward) and

5'-CTATTCCTTTGCCCTCGGAC-3' (reverse);

for actin (endogenous standard, partial coding sequence),

5'-GGTATACGCTTCCTCACGCT-3' (forward) and

5'-CTCGCAGTCTCAAGCTCCT-3' (reverse).

The genomic PCR reactions were performed in 20- $\mu$ L reaction mixture containing 50 ng of genomic DNA, 0.5  $\mu$ M each primer, 0.2 mM dNTPs, 1 $\times$  reaction buffer, and 0.5 U of Blend *Taq* DNA polymerase (Toyobo, Osaka, Japan). After a 2-min incubation at 94°C, 35 cycles were performed as follows: for *HvACT1*, 30 s at 96°C, 30 s at 64°C, and 1 min at 72°C; for *HPT*, 30 s at 96°C, 30 s at 68°C, and 1 min at 72°C; and for actin, 30 s at 96°C and 1 min at 68°C. For the RT-PCR analysis, the PCR reactions were performed as for the genomic PCR, except 50 ng of synthesised cDNA was used as the template, 1.25 U of Blend *Taq* DNA polymerase was used, and the amplification cycles were increased to 40 for the *HvACT1* and *HPT* genes. The amplified products were detected with ethidium bromide staining after agarose-gel electrophoresis.

RT-PCR analysis for *HvACT1* transcription in the ACT transformants during 16-d culture period was performed using gene-specific primers,

5'-ACCGGCAACGTCATCCTCTG-3' (forward) and

5'-CTAGTCGAGGCTGTAGCAGCAG-3' (reverse),

which amplify the partial coding sequence. The PCR reactions were performed in 20- $\mu$ L reaction mixture containing 50 ng of cDNA, 0.5  $\mu$ M each primer, 0.2 mM dNTPs, 1 $\times$  reaction buffer, and 0.5 U of Blend *Taq* DNA polymerase. After a 2-min incubation at 94°C, 35 cycles were performed as follows: 30 s at 96°C, 30 s at 68°C, and 1 min at 72°C. The amplified products were detected with ethidium bromide staining after agarose-gel electrophoresis.

### ***Expression and purification of recombinant HvACT1 enzyme***

The pUC118 plasmid harbouring *HvACT1* cDNA<sup>1</sup> was used as the PCR template to prepare DNA encoding the full-length HvACT1 enzyme. The DNA fragment was amplified with the primers,

5'-CGCGCGGCAGCCATATGAAGATCACCGTGCACTCTTC-3' (forward) and

5'-GTCATGCTAGCCATACTAGTCGAGGCTGTAGCAG-3' (reverse).

The amplified DNA was inserted into the NdeI site of vector pET28a (Novagen, Madison, WI, USA) using an In-Fusion HD Cloning Kit (Takara Bio). The resulting plasmid was introduced into *Escherichia coli* strain BL21-CodonPlus (DE3)-RIL (Agilent Technologies, Santa Clara, CA, USA) for expression of the N-terminally His-tagged enzyme.

Culturing of the recombinant *E. coli*, induction of enzyme expression, and the extraction and purification of the His-tag-free recombinant enzyme were performed as described previously<sup>2</sup> except for the use of 50 mM Tris-HCl buffer (pH 7.5) as the basal buffer.

**Table S1 Specific activity levels of the recombinant HvACT1 enzyme.**

| Substrate <sup>a</sup>  |               | Specific activity<br>(nkat/mg) <sup>b</sup> | Relative activity<br>(%) |
|-------------------------|---------------|---------------------------------------------|--------------------------|
| Acyl-donor              | Acyl-acceptor |                                             |                          |
| <i>p</i> -Coumaroyl-CoA | Agmatine      | 870 ± 35                                    | 100                      |
| Feruloyl-CoA            | Agmatine      | 480 ± 1.7                                   | 55                       |
| <i>p</i> -Coumaroyl-CoA | Putrescine    | 3.3 ± 0.11                                  | 0.38                     |
| Feruloyl-CoA            | Putrescine    | 1.0 ± 0.014                                 | 0.11                     |

Data are means ± SDs ( $n = 3$ ).

<sup>a</sup>Enzyme activity was measured at 100 μM.

<sup>b</sup>One katal (kat) of enzyme activity was defined as the amount of enzyme that catalyses the formation of the reaction product at a rate of 1 mol/s.

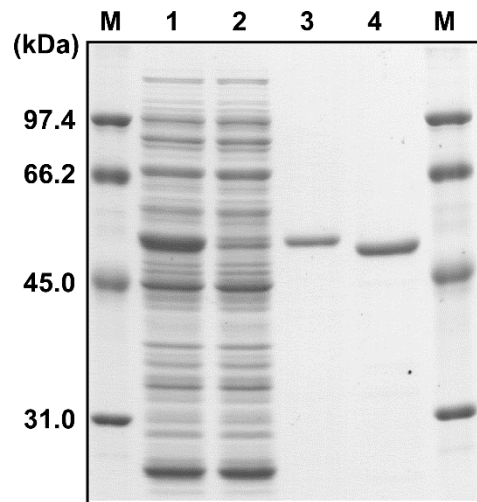

**Figure S1 Purification of the recombinant HvACT1 enzyme expressed in *E. coli*.**

Protein from each purification step was separated by SDS-PAGE on a 12.5% gel and stained with Coomassie Brilliant Blue R-250. Lane M, Molecular size markers; Lane 1, crude *E. coli* extract; Lane 2, column run-through from metal-affinity chromatography; Lane 3, eluate from metal-affinity chromatography; Lane 4, Superdex 200 after thrombin digestion.

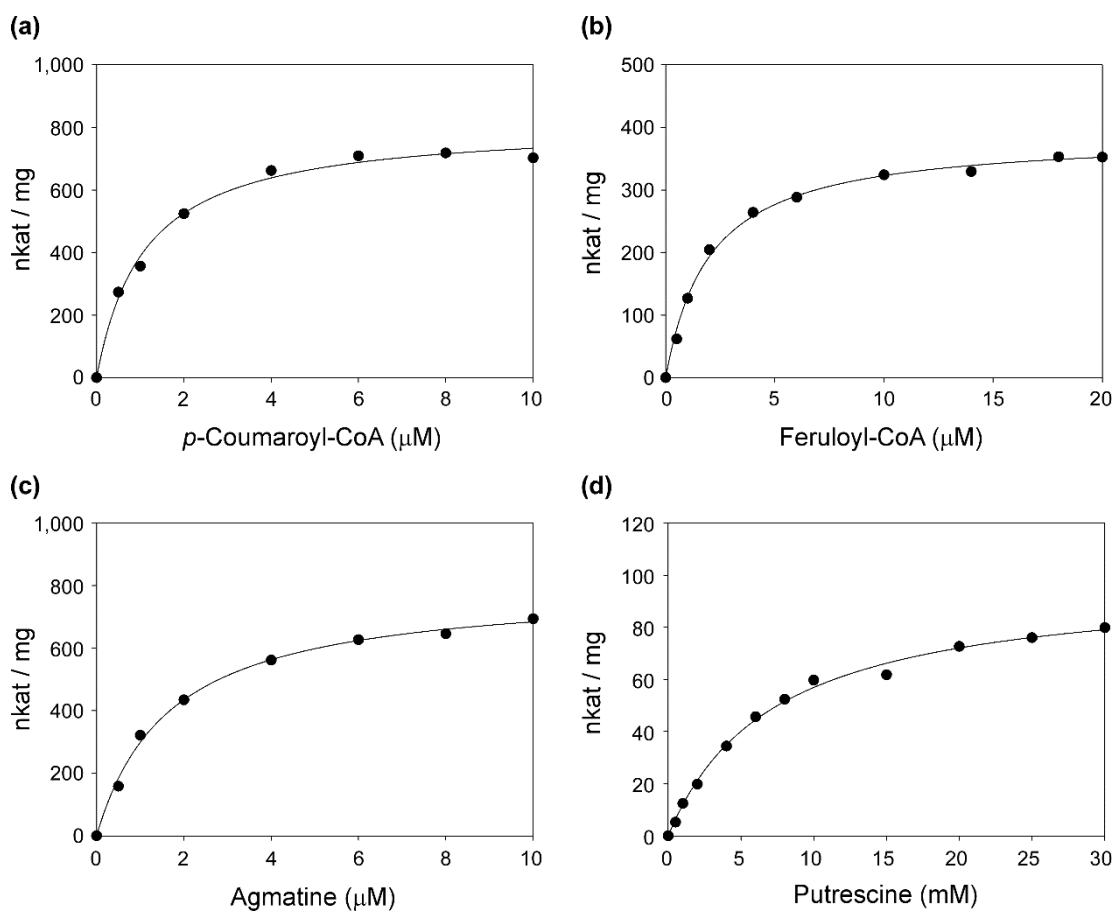

**Figure S2 Michaelis–Menten plots of the recombinant HvACT1 enzyme expressed in *E. coli* for acyl-donors (a, b) and acyl-acceptors (c, d).**

(a) Dependence of pCA formation on the concentration of *p*-coumaroyl-CoA in the presence of 100 μM agmatine, (b) dependence of FA formation on the concentration of feruloyl-CoA in the presence of 100 μM agmatine, (c) dependence of pCA formation on the concentration of agmatine in the presence of 100 μM *p*-coumaroyl-CoA, (d) dependence of pCP formation on the concentration of putrescine in the presence of 100 μM *p*-coumaroyl-CoA.  $n = 1$ . One katal (kat) of enzyme activity was defined as the amount of enzyme that catalyses the formation of the reaction product at a rate of 1 mol/s. Correlation coefficients ( $R^2$ ) in the nonlinear regressions in (a), (b), (c), and (d) were 0.993, 0.996, 0.997, and 0.996, respectively. See Table 1 for the kinetic parameters as calculated by nonlinear regression of the data to the Michaelis–Menten equation.

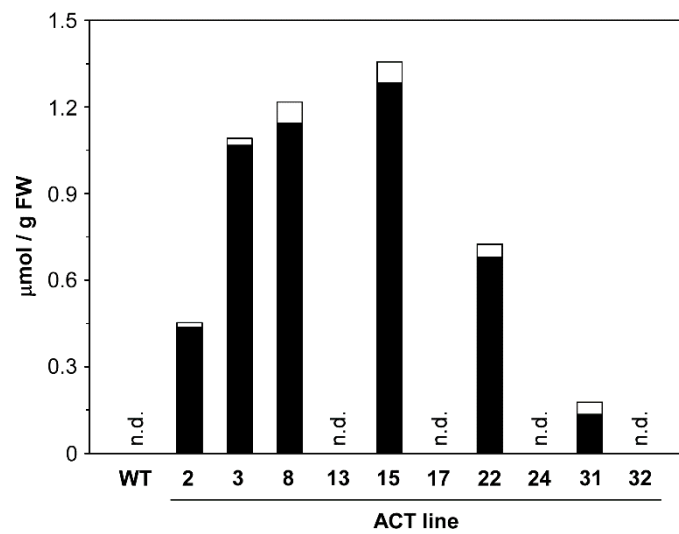

**Figure S3 The pCA and FA contents in 10 calli selected as potential ACT transformants.**

Two-week-old calli grown on a solid selective medium were analysed ( $n = 1$ ). ■, pCA; □, FA; WT, wild-type; n.d., not detected.

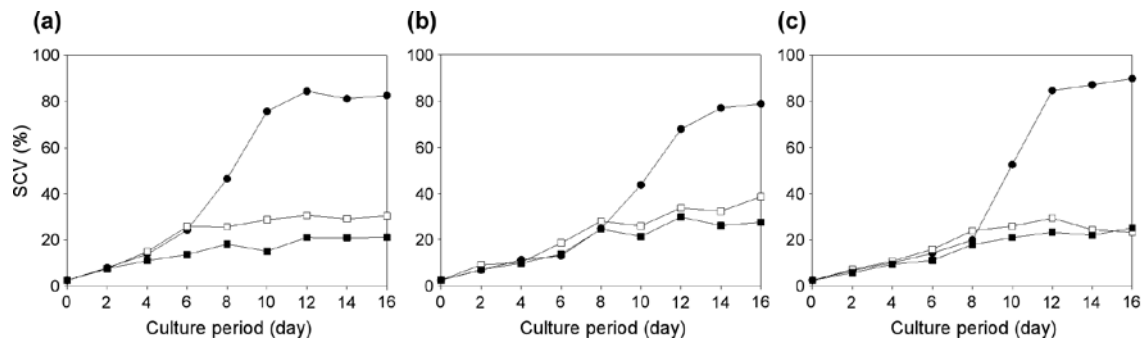

**Figure S4 Growth profiles of ACT transformed suspension cells.**

Growth profiles of suspension cells starting from 2.5% SCV (sedimented cell volume per 100 mL medium) under PR (●), LG1 (□), and LG2 (■) conditions. (a) Wild-type, (b) ACT-line 15, (c) ACT-line 22.  $n = 1$ .



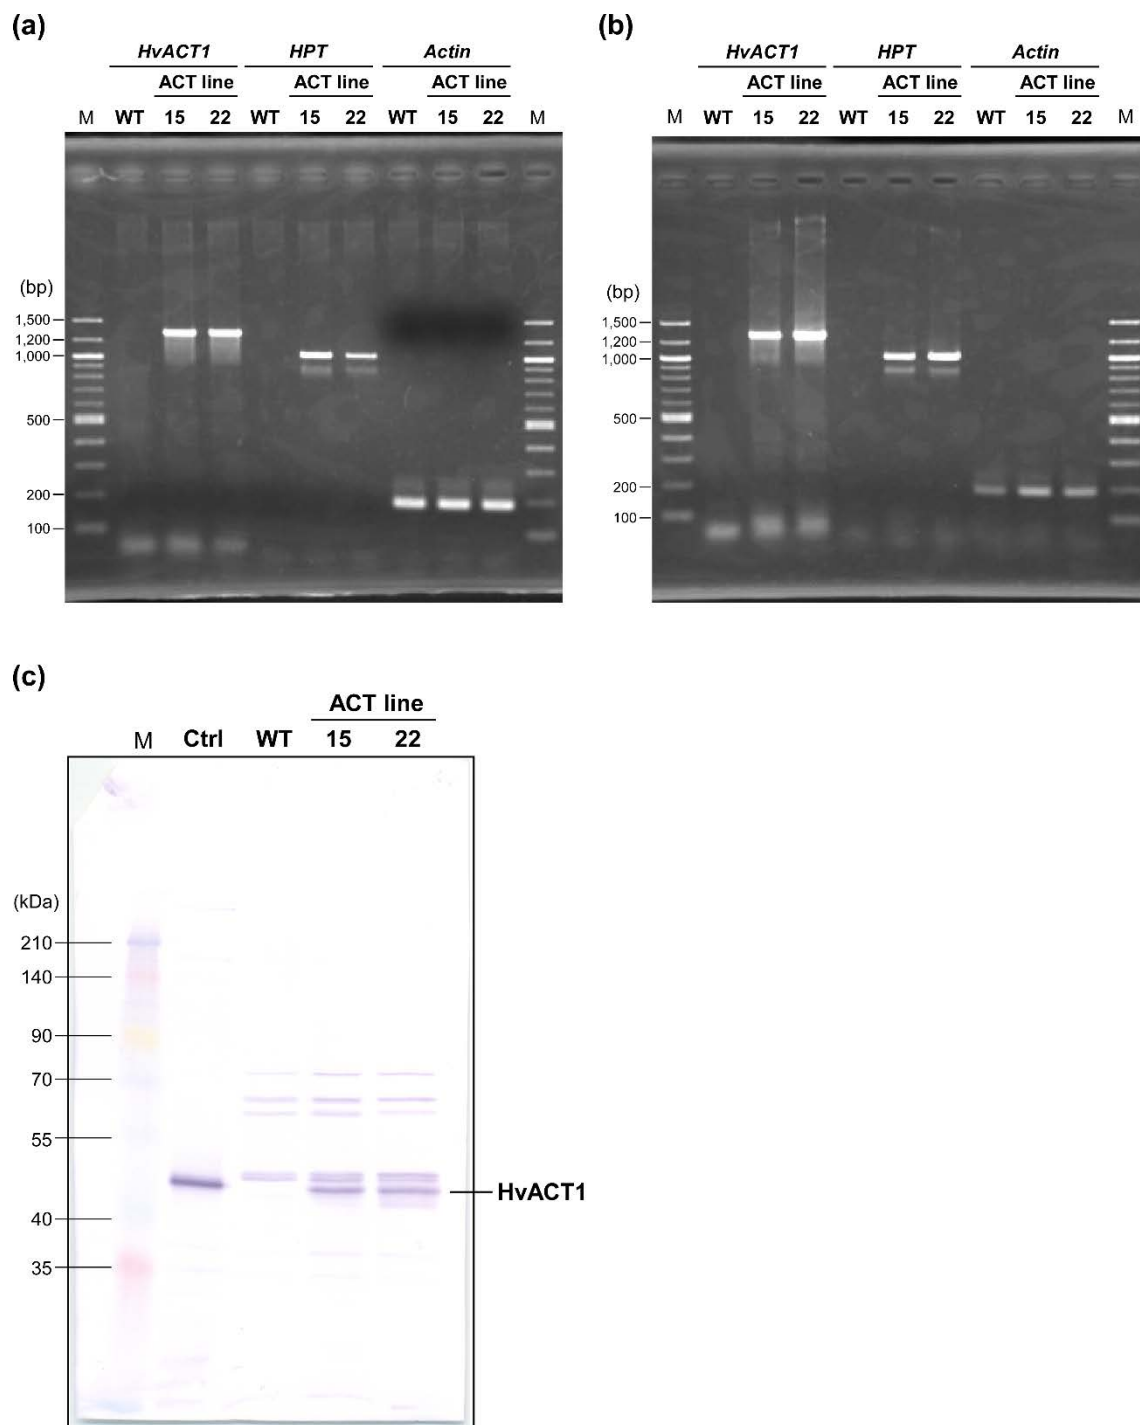

**Figure S5 Full-length agarose gels and blot for the data presented in Fig. 2.**

(a) Genomic PCR gel, (b) RT-PCR gel, (c) immunoblot. Lane M in (a) and (b) is 100 bp DNA ladder marker (New England BioLabs, Ipswich, MA, USA) and that in (c) is prestained protein XL-ladder marker (APRO Life Science Institute).

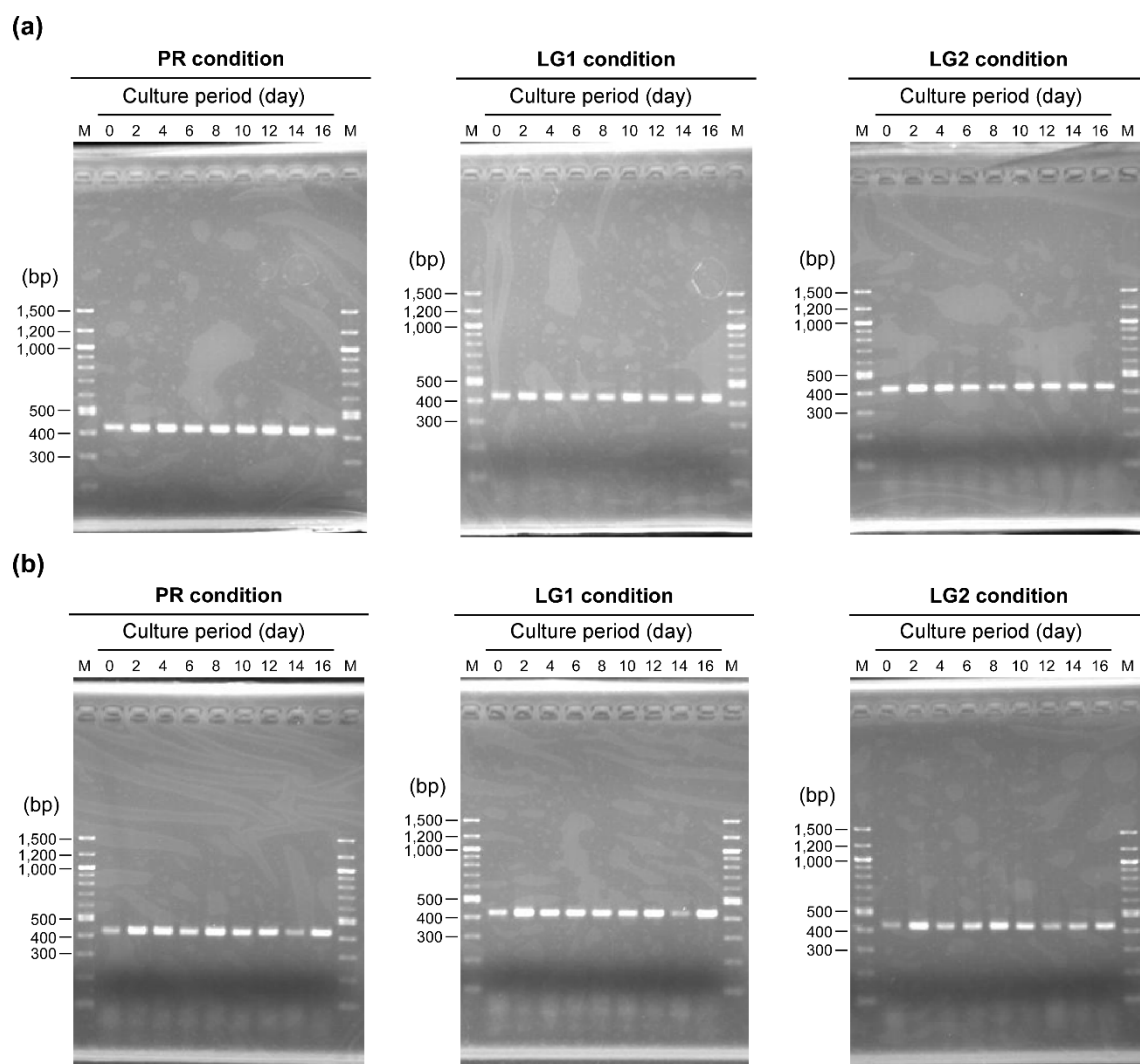

**Figure S6 Full-length agarose gels for the data presented in Fig. 3.**

**(a)** ACT-line 15, **(b)** ACT-line 22. Lane M, 100 bp DNA ladder marker.

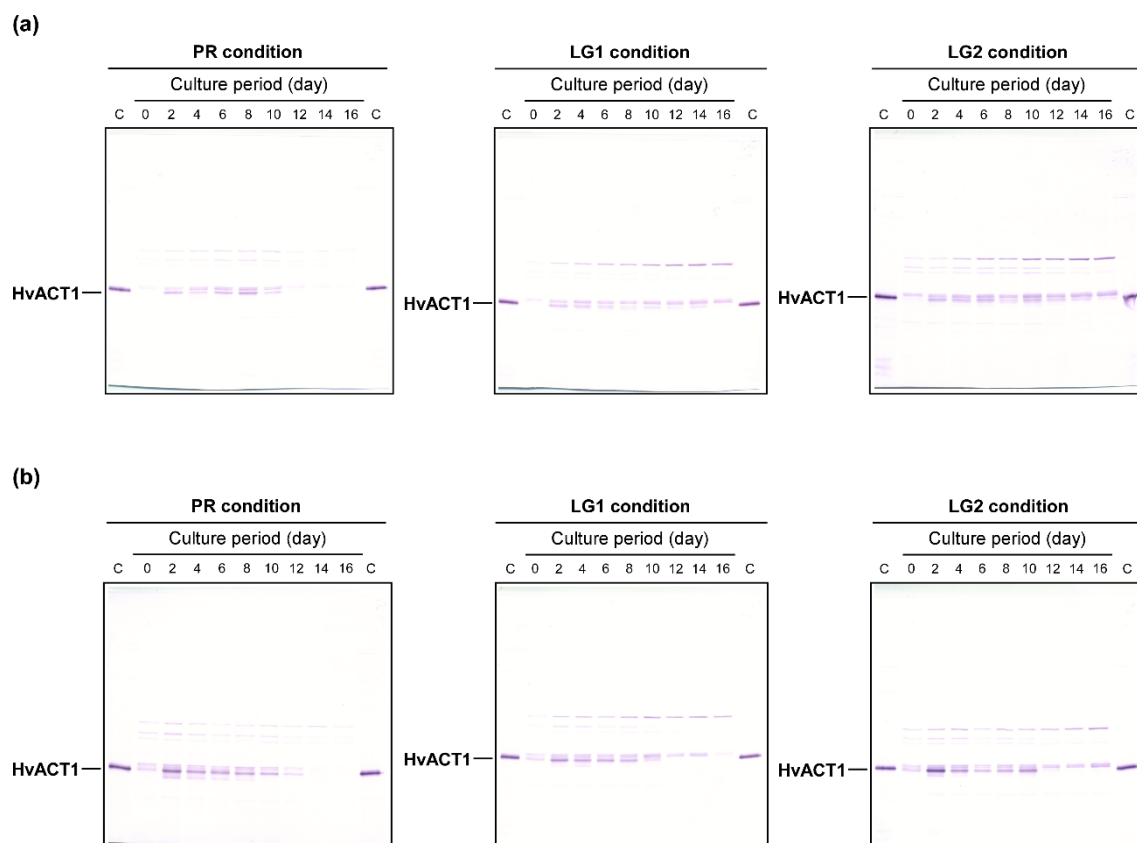

**Figure S7 Full-length blots for the data presented in Fig. 3.**

(a) ACT-line 15, (b) ACT-line 22. Lane C is a positive control (recombinant His-tag-free HvACT1 enzyme expressed in *E. coli*).

## References for Supplementary Information

1. Nomura, T. *et al.* Chromosome arm location of the genes for the biosynthesis of hordatines in barley. *Genes Genet. Syst.* **82**, 455–464 (2007).
2. Nomura, T., Tsuchigami, A., Ogita, S. & Kato, Y. Molecular diversity of tuliposide A-converting enzyme in the tulip. *Biosci. Biotechnol. Biochem.* **77**, 1042–1048 (2013).
